# Supplementary material
Source: PubMed Central journal article supplement (PMC10601409)
Supplement: NIHMS1922444-supplement-jm-2021-00598c_SI_1.pdf [file NIHMS1922444-supplement-jm-2021-00598c_SI_1.pdf]

## SUPPORTING INFORMATION

### Structure-based optimization of ML300 derived, non-covalent inhibitors targeting the severe acute respiratory syndrome coronavirus 3CL protease (SARS-CoV-2 3CL<sup>pro</sup>)

Sang Hoon Han<sup>a</sup>, Christopher M. Goins<sup>a</sup>, Tarun Arya<sup>a</sup>, Woo-Jin Shin<sup>b</sup>, Joshua Maw<sup>a</sup>, Alice Hooper<sup>a</sup>, Dhiraj P. Sonawane<sup>a</sup>, Matthew R. Porter<sup>a</sup>, Breyanne E. Bannister<sup>c</sup>, Rachel D. Crouch<sup>c</sup>, A. Abigail Lindsey<sup>a</sup>, Gabriella Lakatos<sup>a</sup>, Steven R. Martinez<sup>a</sup>, Joseph Alvarado<sup>a</sup>, Wendell S. Akers<sup>c</sup>, Nancy S. Wang<sup>a</sup>, Jae U. Jung<sup>d,e</sup>, Jonathan D. Macdonald<sup>a</sup>, Shaun R. Stauffer<sup>a\*</sup>

<sup>a</sup>Center for Therapeutics Discovery, Lerner Research Institute, Cleveland Clinic, Cleveland, OH, 44195, USA

<sup>b</sup>Cleveland Clinic Florida Research & Innovation Center, Port St. Lucie, FL, 34987, USA

<sup>c</sup>Department of Pharmaceutical Science, Lipscomb University College of Pharmacy, Nashville, TN, 37204, USA

<sup>d</sup>Department of Cancer Biology, Lerner Research Institute, Cleveland Clinic, Cleveland, OH, 44195, USA

<sup>e</sup>Center for Global and Emerging Pathogens Research, Lerner Research Institute, Cleveland Clinic, Cleveland, OH, 44195, USA

\*Corresponding author, Email: [stauffs2@ccf.org](mailto:stauffs2@ccf.org)

#### Table of Contents

##### *Supplemental Data*

|                                                                                                          |    |
|----------------------------------------------------------------------------------------------------------|----|
| Figure S1. Comparison of SARS-CoV-2 3CL <sup>pro</sup> X-ray crystal structures of <b>1</b> and <b>5</b> | S2 |
| Figure S2. SARS-CoV-1 3CL <sup>pro</sup> X-ray crystal structures of <b>19</b> , <b>21</b> , <b>35</b>   | S2 |
| Table S1. Tier 1 DMPK Summary                                                                            | S3 |
| Table S2. Fragmentation of <b>36</b> and proposed metabolites in Human S9                                | S4 |

##### *Structural Biology Experimental Details*

|                                                                                          |    |
|------------------------------------------------------------------------------------------|----|
| Table S3. SARS CoV-2 3CL <sup>pro</sup> X-ray Data Collection and Refinement Statistics. | S5 |
| Table S4. SARS-CoV-1 3CL <sup>pro</sup> X-ray Data Collection and Refinement Statistics. | S6 |
| Figure S3. Ligand electron density maps                                                  | S7 |

##### *Compound HPLC Traces*

|                                                                  |     |
|------------------------------------------------------------------|-----|
| <i>VeroE6 CPE SARS-CoV-2 antiviral activity data compound 41</i> | S19 |
| Figure S4. Concentration-response-curve                          | S19 |
| Table S5. CPE Vero E6 infected cells % viability raw data        | S19 |

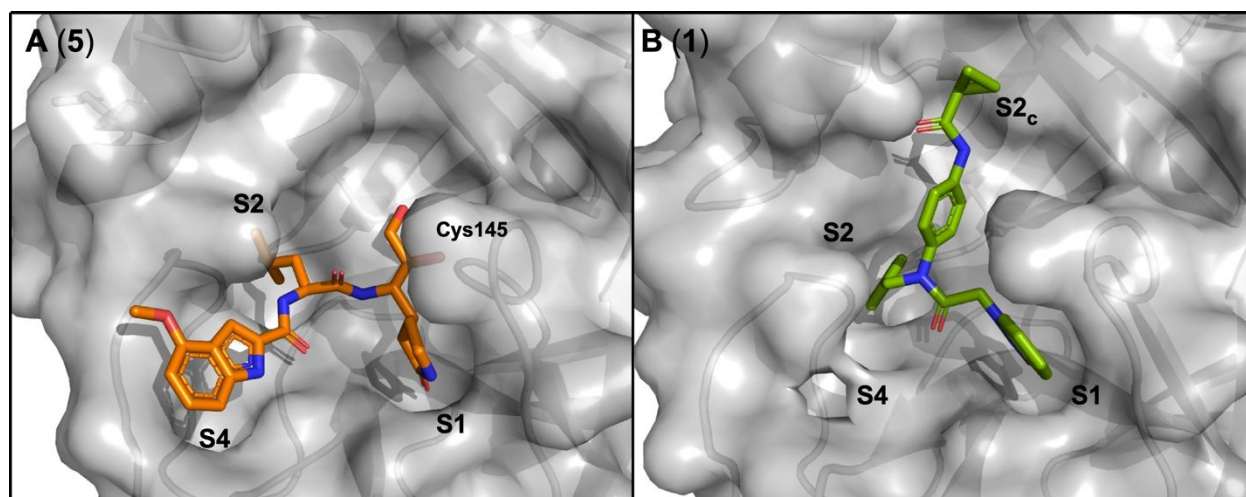

**Supplemental Figure S1.** Comparison of 3CL<sup>pro</sup> main binding site when bound to covalent inhibitor **5**, and this series lead, **1**. The two molecules have significantly different binding poses, occupying alternate regions of the enzyme binding pocket. **A** – Published X-ray co-crystal structure of **5** – SARS-CoV-2 3CL<sup>pro</sup> (PDB: 6XHM); **B** – X-ray co-crystal structure of **1** (ML300) bound to SARS-CoV-2 3CL<sup>pro</sup> (PDB: 7LME).

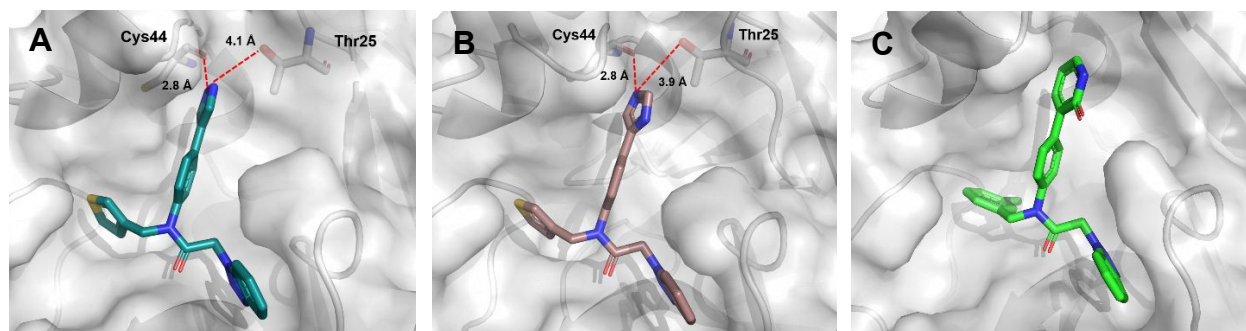

**Supplemental Figure S2.** X-ray crystal structures of SARS-CoV-1 3CL<sup>pro</sup> in complex with compounds, **19** (A), **21** (B), and **35** (C). All structures were generated by soaking apo-crystals with compound DMSO stock, and via this methodology we observe a glycerol molecule (not shown) in each structure in the S4 region.

**Supplemental Table S1.** Summary of tier 1 DMPK data.

| Cmpd. | HLM <sup>a</sup>          |                                   | Human S9                          |                                  | RLM <sup>b</sup>          |                                   | PPB, F <sub>u</sub> (%) <sup>c</sup> |               | MDCK <sup>d</sup>                                  | CYP Profile (% Inh. at 10 μM) <sup>e</sup> |      |      |
|-------|---------------------------|-----------------------------------|-----------------------------------|----------------------------------|---------------------------|-----------------------------------|--------------------------------------|---------------|----------------------------------------------------|--------------------------------------------|------|------|
|       | t <sub>1/2</sub><br>(min) | CL <sub>int'</sub><br>(mL/min/kg) | CL <sub>int'</sub><br>(mL/min/kg) | CL <sub>hep</sub><br>(mL/min/kg) | t <sub>1/2</sub><br>(min) | CL <sub>int'</sub><br>(mL/min/kg) | Human<br>Plasma                      | Rat<br>Plasma | P <sub>app</sub> [A-B]<br>(x10 <sup>-6</sup> cm/s) | 3A4                                        | 2D6  | 2C9  |
| 8     | 2.0                       | 1263.5                            |                                   |                                  | *                         | -                                 | 0.62%                                | **            | 80                                                 | 85.7                                       | 44.8 | 63.4 |
| 19    | 1.7                       | 1465.1                            |                                   |                                  | 2.6                       | 1995                              | 0.35%                                | **            | 59.8                                               | 95.8                                       | 61.9 | 98.0 |
| 21    | 16.8                      | 168                               |                                   |                                  | 10.0                      | 553                               | 1.7%                                 | **            | 33                                                 | 98.8                                       | 80   | 99   |
| 25    | 1.1                       | 2378.4                            |                                   |                                  | *                         | -                                 | 0.25%                                | 2.20%         | 81                                                 | 89.6                                       | 45.5 | 72.3 |
| 27    | 19.1                      | 125.3                             |                                   |                                  | 2.2                       | 2568                              | 2.41%                                | 23.00%        | 71.6                                               | 64.0                                       | 18.3 | 1.7  |
| 28    | *                         | -                                 |                                   |                                  | *                         | -                                 | 0.20%                                | 0.74%         | 55                                                 | 92.8                                       | 79.5 | 89.5 |
| 31    | *                         | -                                 |                                   |                                  | *                         | -                                 | 0.24%                                | 0.75%         | 59.5                                               | 93.3                                       | 82.9 | 89.2 |
| 33    | *                         | -                                 |                                   |                                  | *                         | -                                 | 0.07%                                | 0.29%         | 24                                                 | 95.6                                       | 82.0 | 84.7 |
| 34    | 2.6                       | 1080                              |                                   |                                  | *                         | -                                 | 0.8%                                 | 5.3%          | 66.9                                               | 95.4                                       | 67   | 59   |
| 35    | 4.4                       | 574.9                             |                                   |                                  | 1.6                       | 3461                              | 1.42%                                | 0.48%         | 43.8                                               | 69.6                                       | 22.6 | 75.0 |
| 36    | 1.0                       | 2621                              | 436                               | 20                               | 1.0                       | 5668                              | 0.1%                                 | **            | 39.4                                               | 96                                         | 63   | 99   |
| 38    | 1.0                       | 2496                              |                                   |                                  | 1.0                       | 5525                              | <0.06%                               | 0.8%          | 20.9                                               | 97.1                                       | 69   | 100  |
| 39    | 1.2                       | 2036                              |                                   |                                  | *                         | -                                 | 0.9%                                 | 6.1%          | 46.7                                               | 92.0                                       | 44   | 89   |
| 40    | 1.2                       | 2175.2                            | 471                               | 20.1                             | *                         | -                                 | 0.2%                                 | 5.6%          | 61.8                                               | 94.1                                       | 42   | 97   |
| 41    | 21.1                      | 141                               |                                   |                                  | 12.3                      | 589                               | 0.7%                                 | 1.8%          | 46.1                                               | 100                                        | 87.2 | 100  |
| 42    | 2.5                       | 980.7                             | 256                               | 19.4                             | 1.6                       | 3555                              | 0.4%                                 | 3.5%          | 61.8                                               | 99                                         | 55   | 98.5 |
| 43    | 4.1                       | 620.4                             | 145                               | 18.3                             | 1.7                       | 3302                              | 1.8%                                 | 11.0%         | 66.7                                               | 87.7                                       | 25.7 | 91.9 |

Tier 1 DMPK generated at Q2 solutions, except hS9 data generated at Lipscomb University College of Pharmacy. <sup>a</sup>HLM – Human liver microsomes; <sup>b</sup>RLM – Rat liver microsomes; <sup>c</sup>F<sub>u</sub> – Fraction Unbound; <sup>d</sup>Permeability in MDCK-MDR1 cells; <sup>e</sup>CYP % inhibition at 10 μM; \* – Rapid clearance, not reliably measured; \*\* – Low compound recovery

**Supplemental Table S2.** Fragmentation of compound **36** and proposed metabolites in Human S9.

| Metabolite                                                        | Structure                                                                           | [M+H] <sup>+</sup> | Fragment Ions      |
|-------------------------------------------------------------------|-------------------------------------------------------------------------------------|--------------------|--------------------|
| <b>36</b><br>Parent                                               | 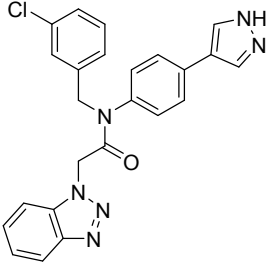   | 443                | 326, 134, 127, 118 |
| <b>M1</b><br><sup>a</sup> 60% of total<br>metabolite peak<br>area |    | 459                | 301, 202, 174, 143 |
| <b>M2</b><br>33% of total<br>metabolite peak<br>area              |   | 459                | 326, 151, 127      |
| <b>M3</b><br>7% of total<br>metabolite peak<br>area               |  | 319                | 202, 186, 174, 119 |

<sup>a</sup> Metabolite formation (%) based on the total peak area (total peak AUC) of the three principle metabolites, M1, M2 and M3.

## Structural Biology Experimental Details

**Supplemental Table S3.** SARS-CoV-2 3CL<sup>pro</sup> X-ray refinement statistics. One crystal was used for each structure. Values in parentheses unless stated represent data in the highest-resolution shell. RMS = Root mean square

| Compound                          | <b>1</b>                  | <b>19</b>                 | <b>21</b>                 |
|-----------------------------------|---------------------------|---------------------------|---------------------------|
| PDB Accession Code                | <b>7LME</b>               | <b>7LMD</b>               | <b>7LMF</b>               |
| <b>Data Collection</b>            |                           |                           |                           |
| Beamline                          | APS 21-ID-F               | APS 21-ID-F               | APS 21-ID-F               |
| Wavelength (Å)                    | 0.978                     | 0.978                     | 0.978                     |
| Resolution range (Å)              | 43.72–2.10<br>(2.18–2.10) | 24.49–1.96<br>(2.03–1.96) | 43.75–2.20<br>(2.28–2.20) |
| Space group                       | P 1 21 1                  | C 1 2 1                   | P 1 21 1                  |
| Unit cell                         |                           |                           |                           |
| a, b, c (Å)                       | 44.45, 53.75, 114.18      | 115.16, 54.34, 44.45      | 44.54, 53.70, 114.75      |
| $\alpha$ , $\beta$ , $\gamma$ (°) | 90, 101.98, 90            | 90, 101.01, 90            | 90, 100.80, 90            |
| Total reflections                 | 227385                    | 61969                     | 204060                    |
| Unique reflections                | 30873 (3016)              | 19327 (1911)              | 27231 (2691)              |
| Multiplicity                      | 7.4 (5.9)                 | 3.2 (3.0)                 | 7.5 (6.9)                 |
| Completeness (%)                  | 99.16 (94.27)             | 98.68 (98.25)             | 99.53 (96.93)             |
| Mean I/ $\sigma$ I                | 15.57 (1.95)              | 31.63 (6.77)              | 19.00 (2.37)              |
| Wilson B-factor                   | 26.18                     | 23.99                     | 29.82                     |
| R-merge                           | 0.139 (0.831)             | 0.066 (0.237)             | 0.126 (0.793)             |
| R-meas                            | 0.149 (0.910)             | 0.079 (0.288)             | 0.135 (0.857)             |
| R-pim                             | 0.054 (0.366)             | 0.043 (0.162)             | 0.049 (0.322)             |
| CC1/2                             | 0.996 (0.705)             | 0.994 (0.901)             | 0.995 (0.793)             |
| <b>Structure Refinement</b>       |                           |                           |                           |
| Reflections used in refinement    | 30823 (2928)              | 19326 (1911)              | 27179 (2623)              |
| Reflections used for R-free       | 1481 (143)                | 960 (78)                  | 1384 (116)                |
| R-work                            | 0.1802 (0.2292)           | 0.1878 (0.2261)           | 0.1857 (0.2307)           |
| R-free                            | 0.2405 (0.2870)           | 0.2340 (0.2919)           | 0.2539 (0.3330)           |
| Number of non-hydrogen atoms      | 4975                      | 2580                      | 4912                      |
| macromolecules                    | 4673                      | 2333                      | 4704                      |
| ligands                           | 62                        | 30                        | 60                        |
| solvent                           | 240                       | 217                       | 148                       |
| Protein residues                  | 609                       | 302                       | 610                       |
| RMS (bonds)                       | 0.007                     | 0.007                     | 0.007                     |
| RMS (angles)                      | 0.84                      | 0.89                      | 0.91                      |
| Ramachandran favored (%)          | 98.35                     | 98.00                     | 96.20                     |
| Ramachandran allowed (%)          | 1.49                      | 2.00                      | 3.30                      |
| Ramachandran outliers (%)         | 0.17                      | 0                         | 0.50                      |
| Rotamer outliers (%)              | 0                         | 0                         | 0                         |
| Clash score                       | 3.68                      | 3.66                      | 3.95                      |
| Average B-factor                  | 28.60                     | 27.08                     | 33.22                     |
| macromolecules                    | 28.33                     | 26.70                     | 33.10                     |
| ligands                           | 36.2                      | 30.74                     | 40.36                     |
| solvent                           | 31.8                      | 30.63                     | 34.2                      |

**Supplemental Table S4.** SARS-CoV-1 3CL<sup>pro</sup> X-ray refinement statistics. One crystal was used for each structure. Values in parentheses unless stated represent data in the highest-resolution shell. RMS = Root mean square

| Compound                       | <b>8</b>                      | <b>19</b>                     | <b>21</b>                     | <b>35</b>                     |
|--------------------------------|-------------------------------|-------------------------------|-------------------------------|-------------------------------|
| PDB Accession Code             | <b>7LMH</b>                   | <b>7LMI</b>                   | <b>7LMG</b>                   | <b>7LMJ</b>                   |
| <b>Data Collection</b>         |                               |                               |                               |                               |
| Beamline                       | APS 21-ID-F                   | APS 21-ID-F                   | APS 21-ID-F                   | APS 21-ID-F                   |
| Wavelength (Å)                 | 0.978                         | 0.978                         | 0.978                         | 0.978                         |
| Resolution range (Å)           | 32.30 - 1.85<br>(1.92 - 1.85) | 32.34 - 1.71<br>(1.77 - 1.71) | 32.33 - 1.69<br>(1.75 - 1.69) | 32.06 - 1.60<br>(1.66 - 1.60) |
| Space group                    | C 1 2 1                       | C 1 2 1                       | C 1 2 1                       | C 1 2 1                       |
| Unit cell                      |                               |                               |                               |                               |
| a, b, c (Å)                    | 107.69 82.47 53.30            | 108.51 82.11 53.38            | 107.54 82.71 53.20            | 108.41 81.82 53.36            |
| $\alpha, \beta, \gamma$ (°)    | 90 105.2 90                   | 90 104.7 90                   | 90 105.3 90                   | 90 104.7 90                   |
| Total reflections              | 76397                         | 97473                         | 99960                         | 114896                        |
| Unique reflections             | 38216 (3632)                  | 48839 (4776)                  | 50018 (4788)                  | 57645 (5434)                  |
| Multiplicity                   | 7.6 (7.4)                     | 7.6 (7.4)                     | 7.6 (7.4)                     | 7.6 (7.4)                     |
| Completeness (%)               | 99.42 (94.90)                 | 99.75 (98.09)                 | 99.50 (95.68)                 | 96.98 (90.93)                 |
| Mean I/ $\sigma$ I             | 22.31 (7.90)                  | 10.76 (2.59)                  | 17.06 (2.73)                  | 7.38 (3.20)                   |
| Wilson B-factor                | 32.29                         | 28.83                         | 32.53                         | 23.62                         |
| R-merge                        | 0.019 (0.092)                 | 0.055 (0.322)                 | 0.030 (0.242)                 | 0.085 (0.277)                 |
| R-meas                         | 0.027 (0.130)                 | 0.077 (0.455)                 | 0.042 (0.342)                 | 0.120 (0.392)                 |
| R-pim                          | 0.019 (0.092)                 | 0.055 (0.322)                 | 0.030 (0.242)                 | 0.085 (0.277)                 |
| CC1/2                          | 0.999 (0.985)                 | 0.987 (0.834)                 | 0.995 (0.923)                 | 0.99 (0.97)                   |
| <b>Structure Refinement</b>    |                               |                               |                               |                               |
| Reflections used in refinement | 38200 (3632)                  | 48829 (4773)                  | 50015 (4788)                  | 57604 (5426)                  |
| Reflections used for R-free    | 1903 (165)                    | 2448 (269)                    | 2502 (253)                    | 2896 (299)                    |
| R-work                         | 0.1540 (0.1797)               | 0.1957 (0.3025)               | 0.1928 (0.2935)               | 0.1968 (0.2418)               |
| R-free                         | 0.2004 (0.2878)               | 0.2094 (0.3297)               | 0.2216 (0.2963)               | 0.2345 (0.2909)               |
| Number of non-hydrogen atoms   |                               |                               |                               |                               |
| macromolecules                 | 2709                          | 2675                          | 2757                          | 2567                          |
| ligands                        | 2393                          | 2420                          | 2390                          | 2401                          |
| solvent                        | 43                            | 42                            | 66                            | 36                            |
| Protein residues               | 273                           | 213                           | 301                           | 130                           |
| RMS (bonds)                    | 306                           | 306                           | 306                           | 306                           |
| RMS (angles)                   | 0.018                         | 0.016                         | 0.015                         | 0.019                         |
| Ramachandran favored (%)       | 2.13                          | 2.03                          | 1.96                          | 2.17                          |
| Ramachandran allowed (%)       | 97.37                         | 97.37                         | 98.68                         | 97.37                         |
| Ramachandran outliers (%)      | 2.63                          | 2.63                          | 1.32                          | 2.63                          |
| Rotamer outliers (%)           | 0                             | 0                             | 0                             | 0                             |
| Clash score                    | 3.76                          | 2.95                          | 1.13                          | 2.62                          |
| Average B-factor               | 3.96                          | 4.31                          | 13.01                         | 2.29                          |
| macromolecules                 | 38.61                         | 34.62                         | 41.22                         | 28.53                         |
| ligands                        | 37.43                         | 33.83                         | 39.04                         | 28.33                         |
| solvent                        | 43.22                         | 39.88                         | 45.30                         | 28.18                         |
|                                | 48.22                         | 42.60                         | 57.70                         | 32.34                         |

**Supplemental Figure S3.** SARS-CoV-1 and CoV-2 3CL<sup>pro</sup> F<sub>o</sub>-F<sub>c</sub> likelihood-weighted omit maps for ligands, with respective sigma contours given:

**A:** SARS-CoV-2 3CL<sup>pro</sup> in complex with compound **1** (PDB:7LME)

Ligand in Chain A, ! = 3.0

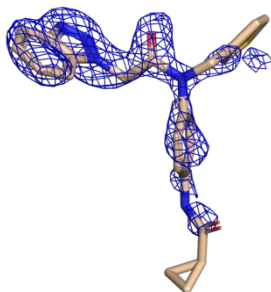

Ligand in Chain B, ! = 3.0

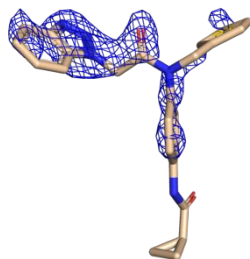

Ligand in Chain A, ! = 2.0

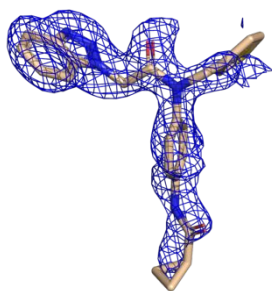

Ligand in Chain B, ! = 2.0

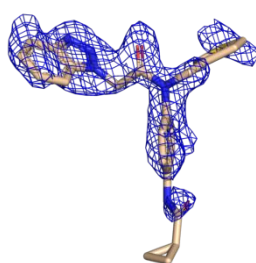

**B:** SARS-CoV-2 3CL<sup>pro</sup> in complex with compound **19** (PDB:7LMD)

Ligand in Chain A, ! = 3.0

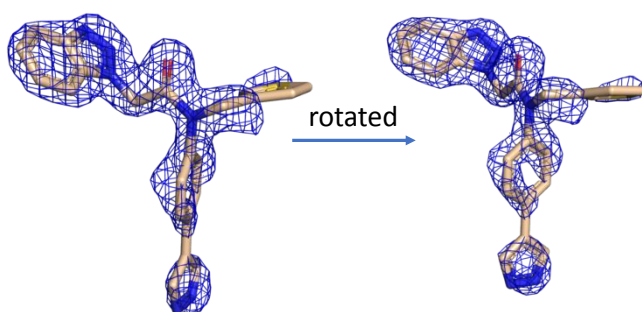

**C:** SARS-CoV-2 3CL<sup>pro</sup> in complex with compound **21** (PDB: 7LMF)

Ligand in Chain A, ! = 3.0

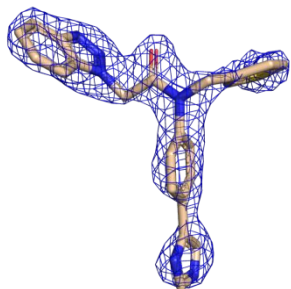

Ligand in Chain B, ! = 3.0

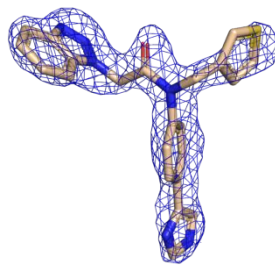

**D:** SARS-CoV-1 3CL<sup>pro</sup> in complex with compound **8** (PDB: 7LMH)

Ligand in Chain A, ! = 3.0

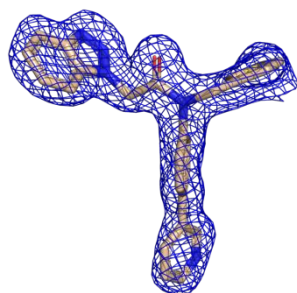

**E:** SARS-CoV-1 3CL<sup>pro</sup> in complex with compound **19** (PDB: 7LMI)

Ligand in Chain A, ! = 3.0

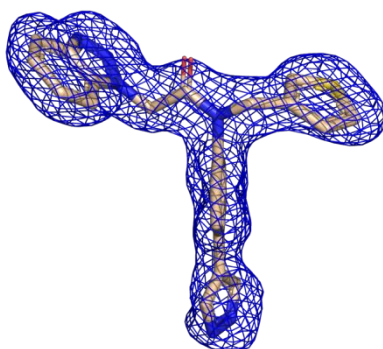



**F:** SARS-CoV-1 3CL<sup>pro</sup> in complex with compound **21** (PDB: 7LMG)

Ligand in Chain A, ! = 3.0

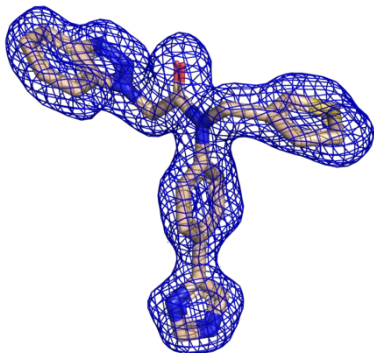

**G:** SARS-CoV-1 3CL<sup>pro</sup> in complex with compound **35** (PDB: 7LMJ)

Ligand in Chain A, ! = 3.0

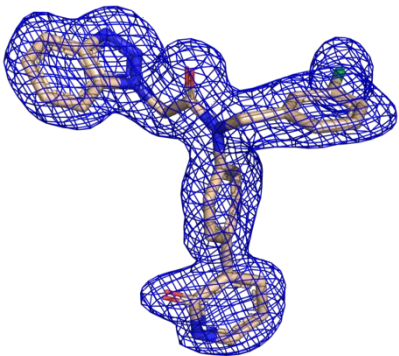

## Compound HPLC Traces

LCMS Method A (see main manuscript) – shown are UV traces @ 254 nm

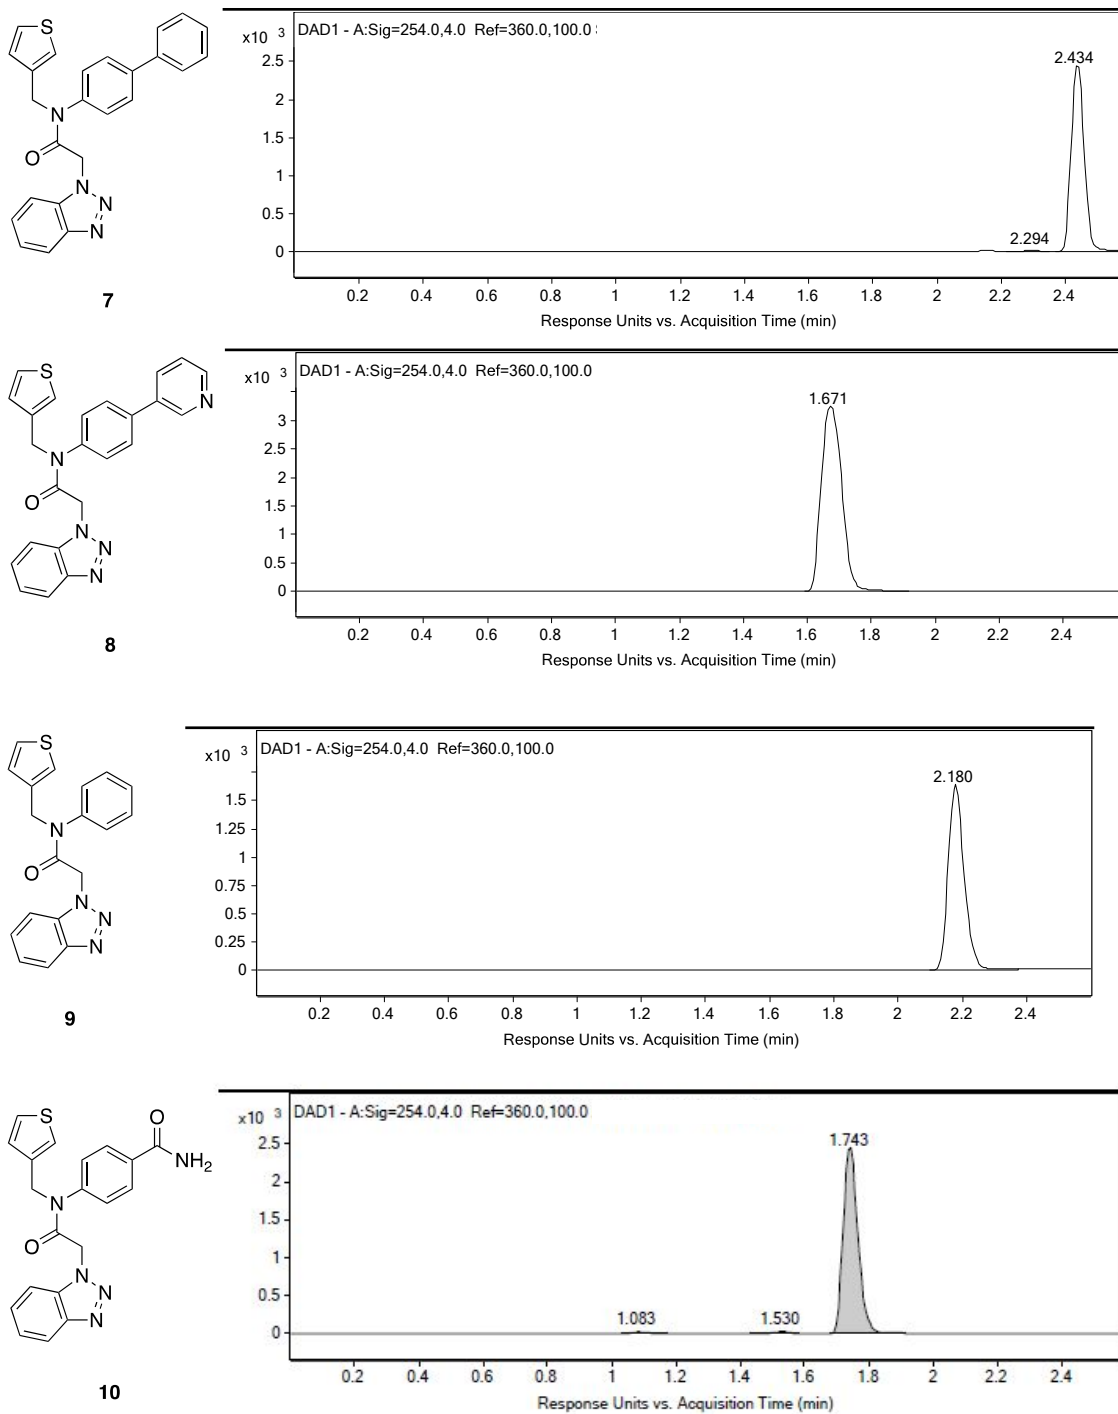

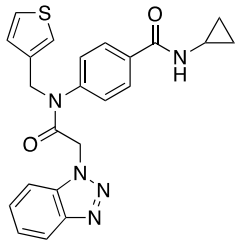

11

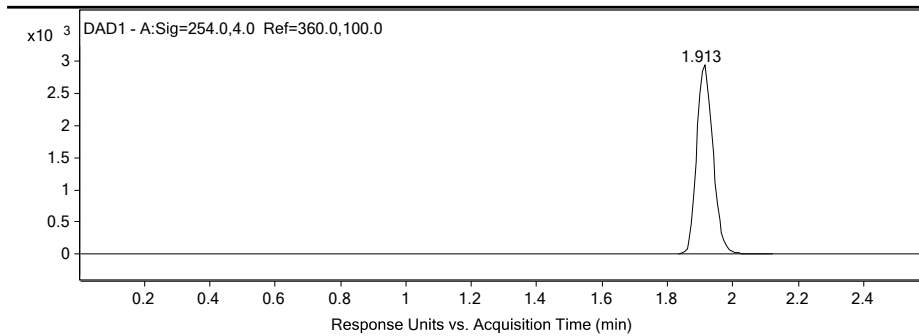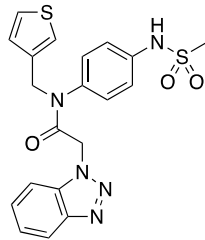

12

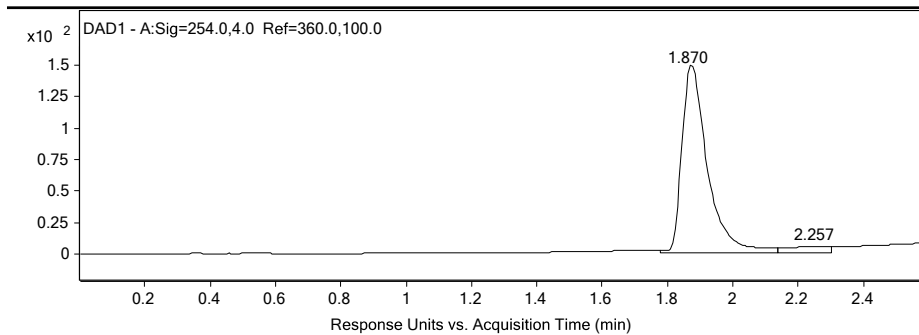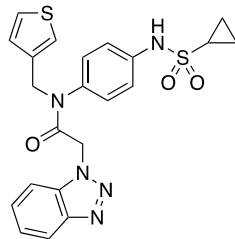

13

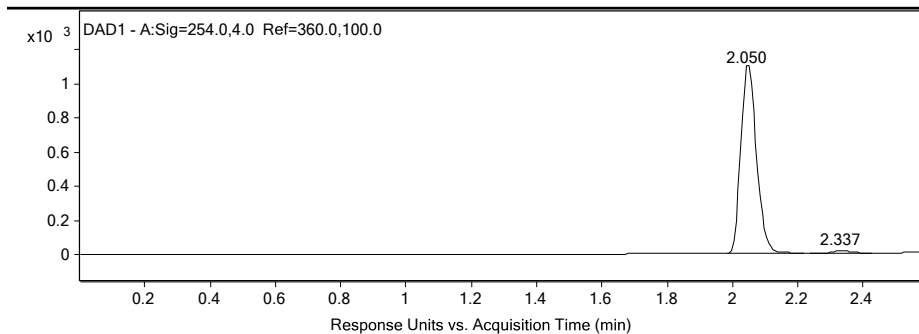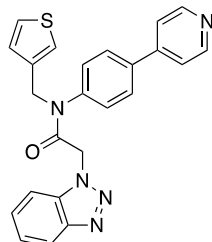

14

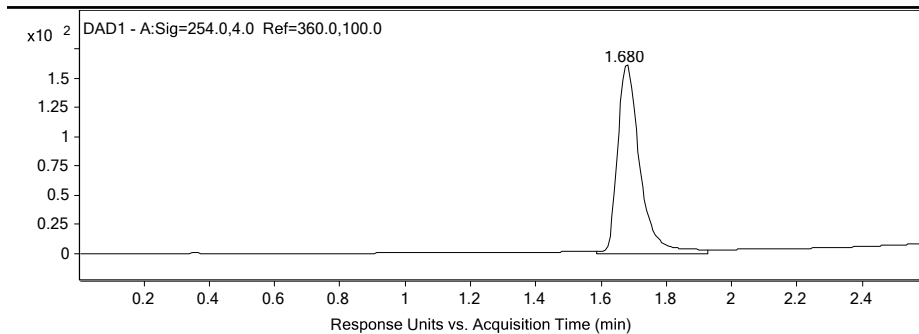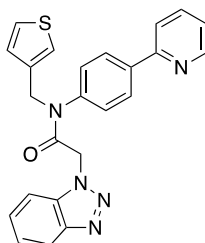

15

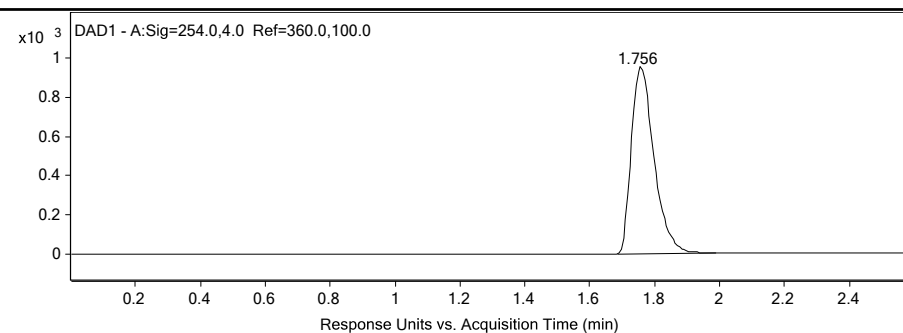

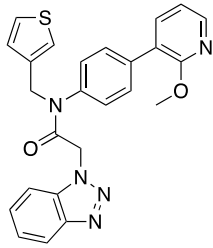

16

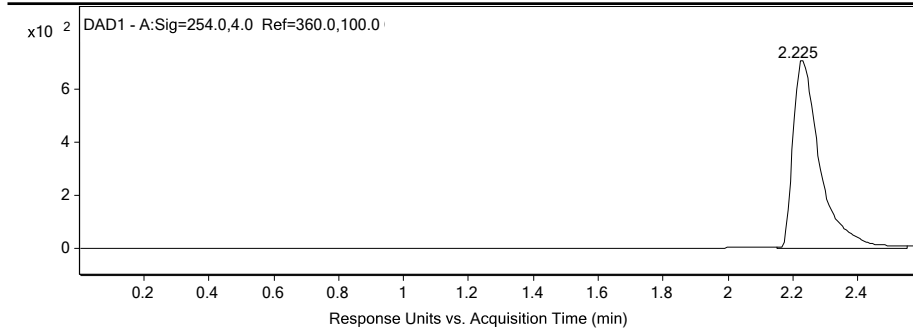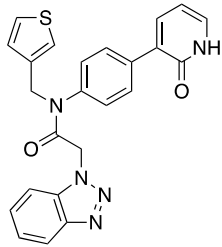

17

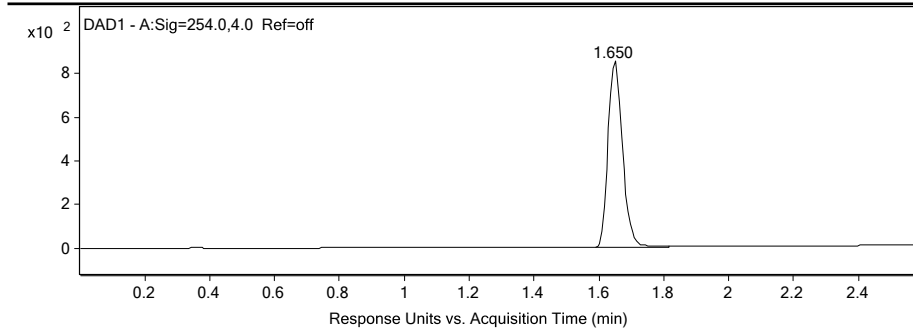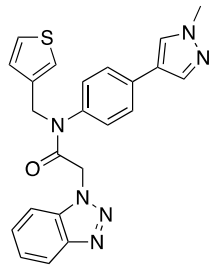

18

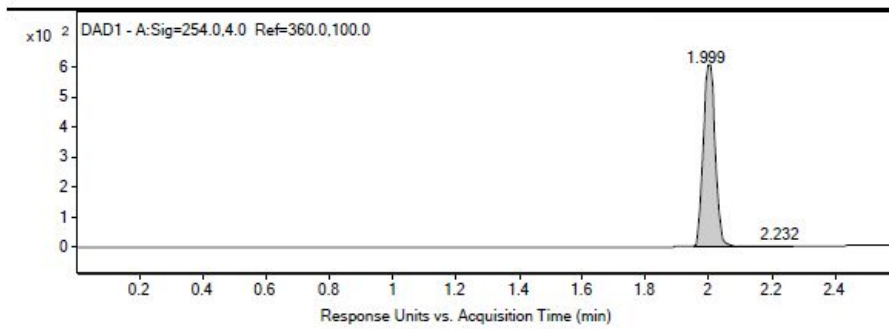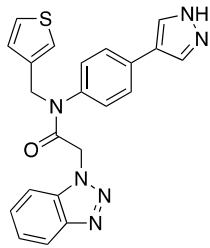

19

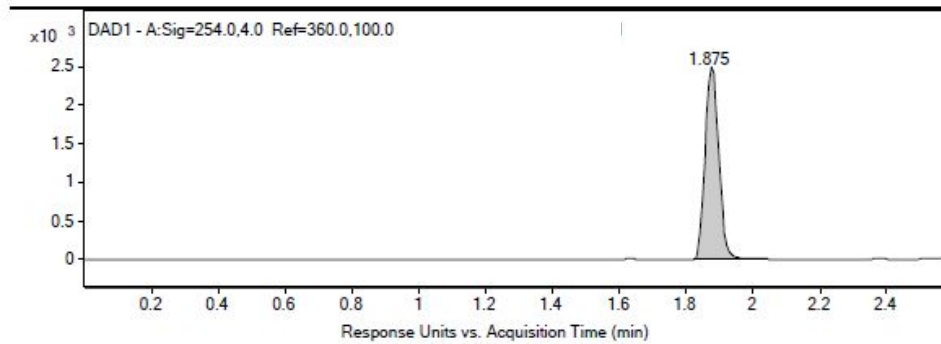

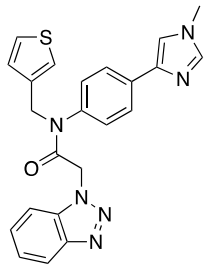

20

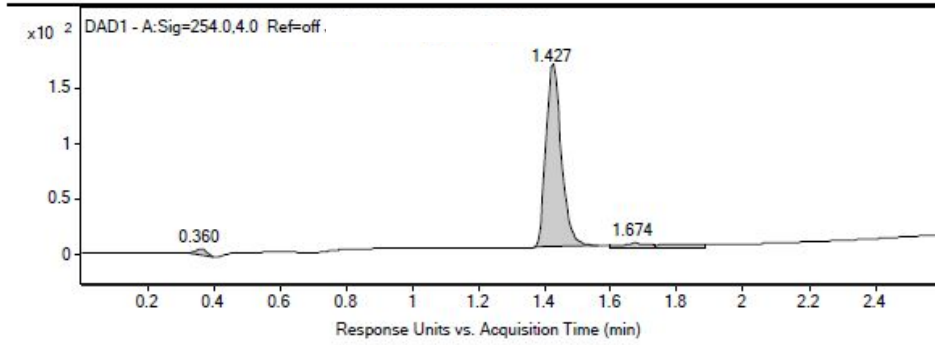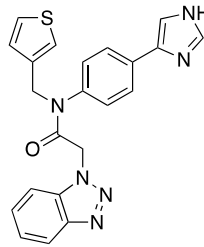

21

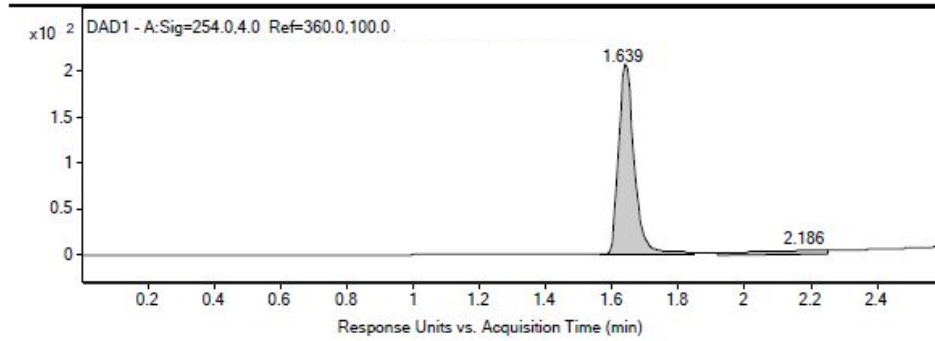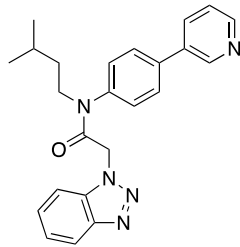

22

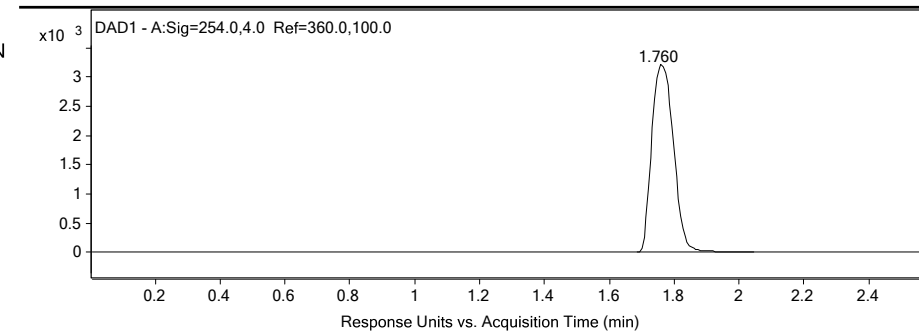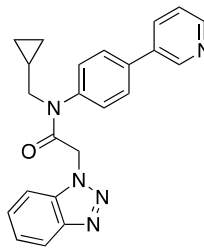

23

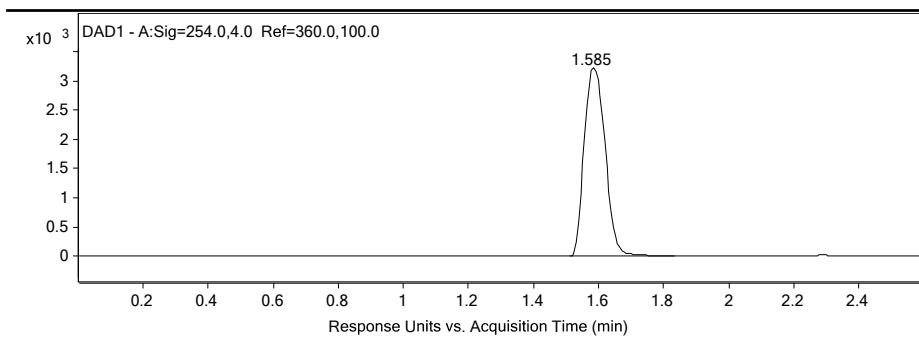

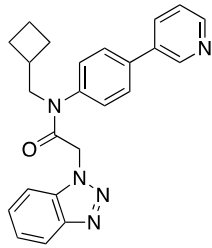

24

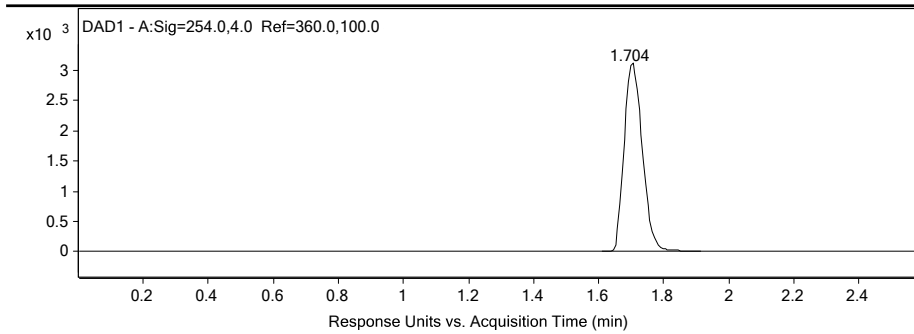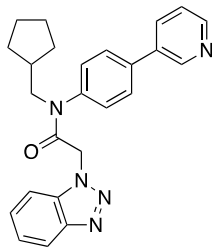

25

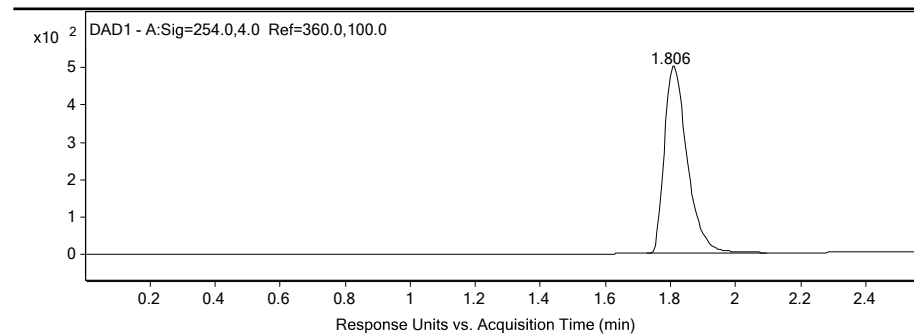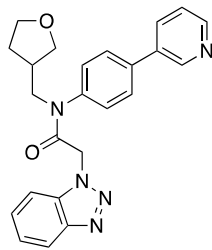

26

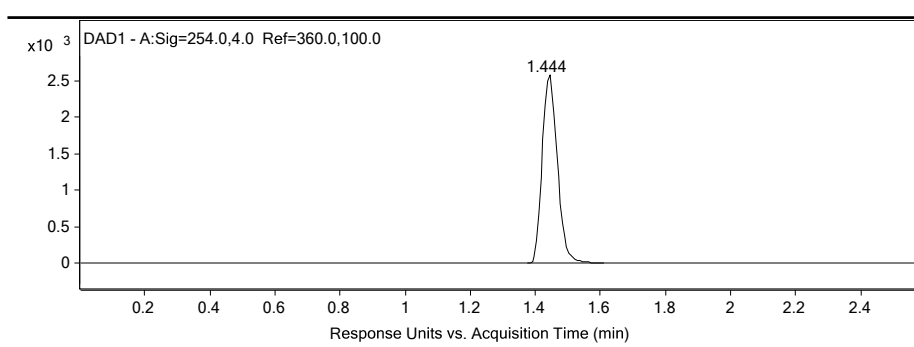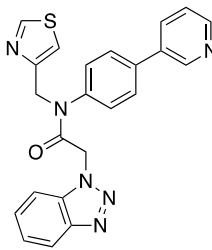

27

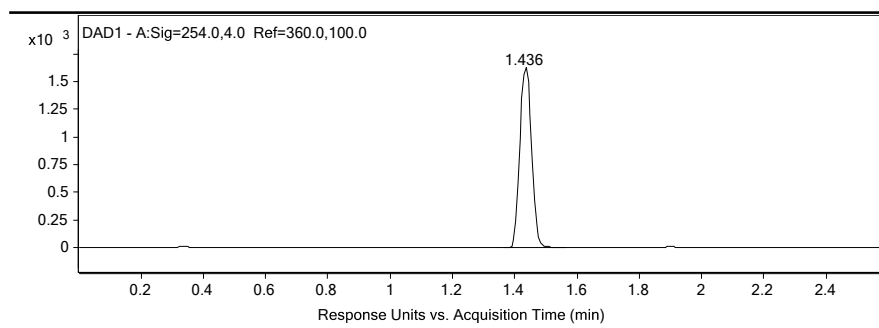

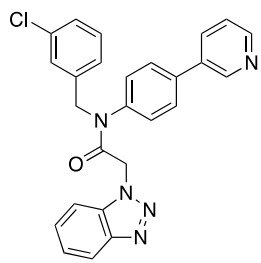

28

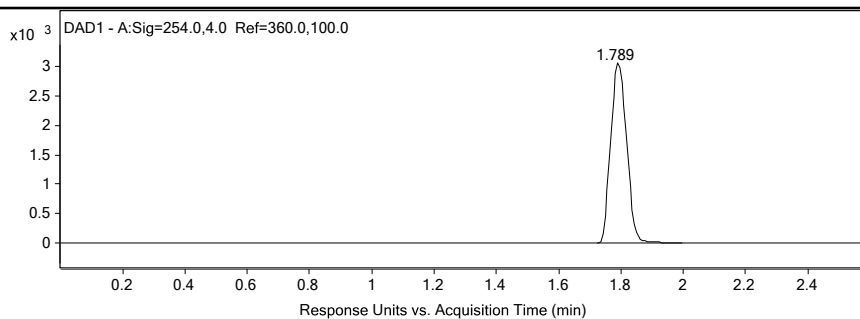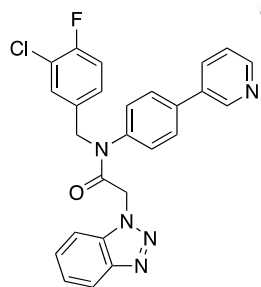

29

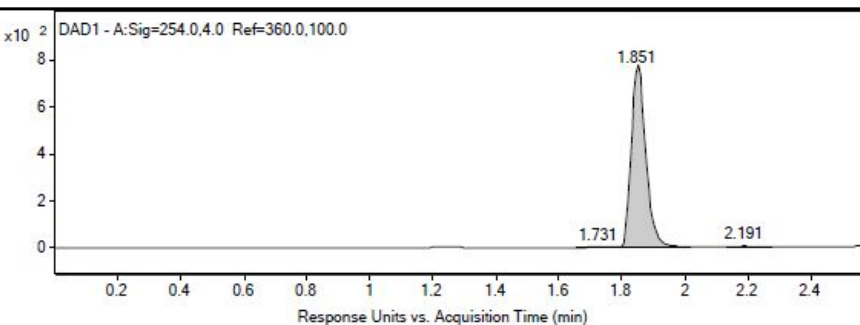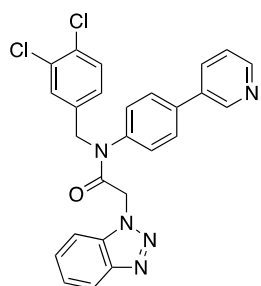

30

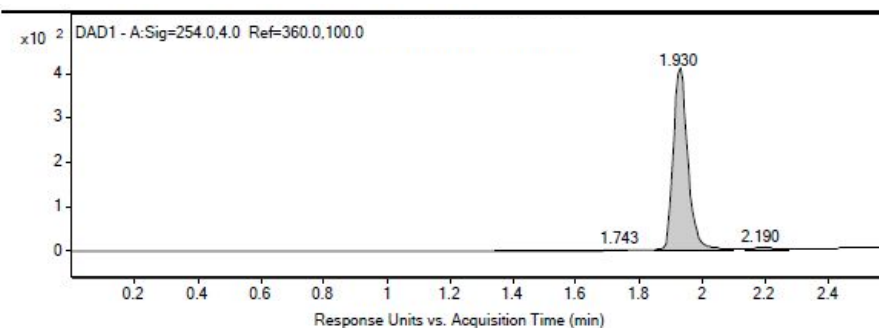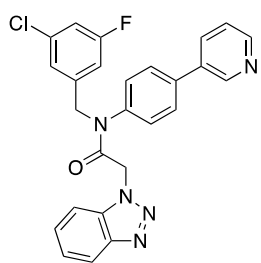

31

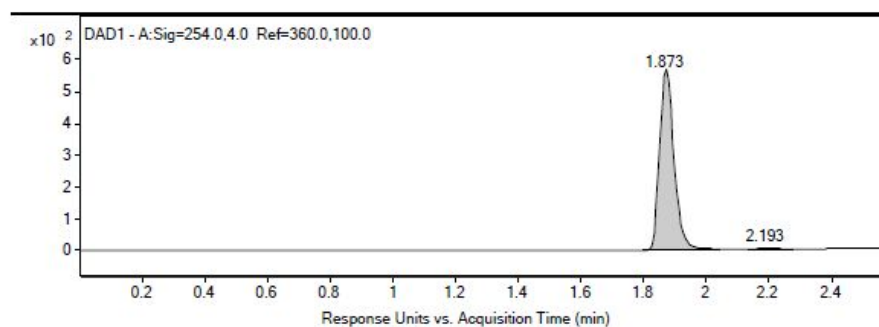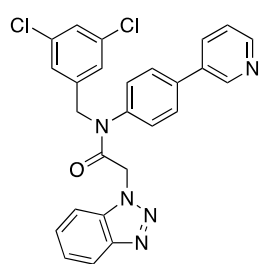

32

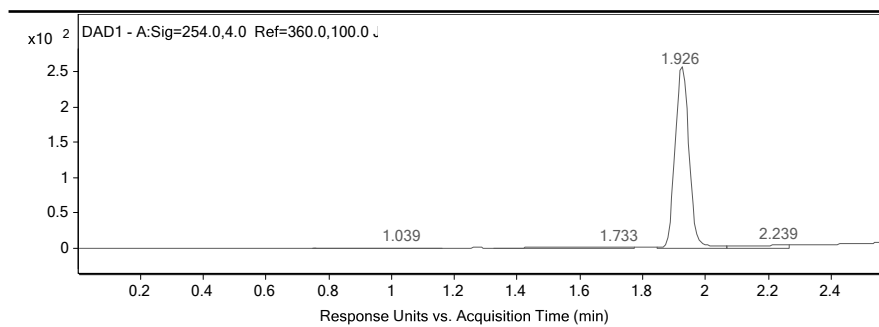

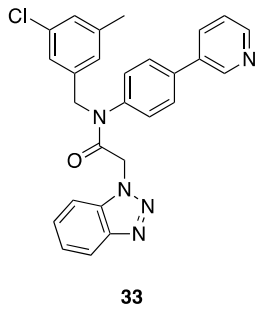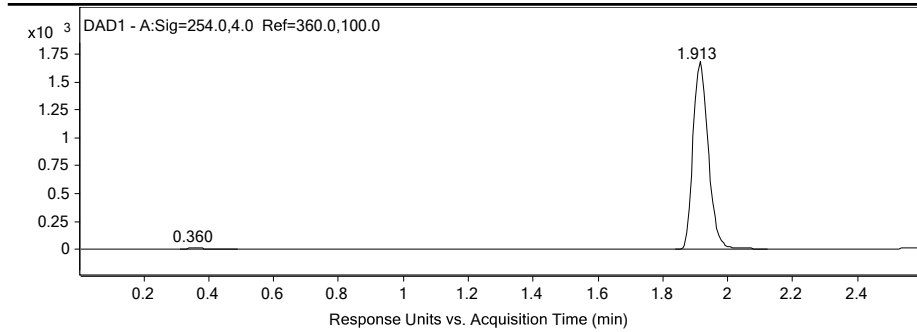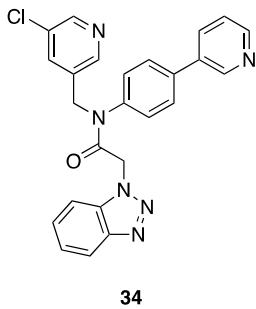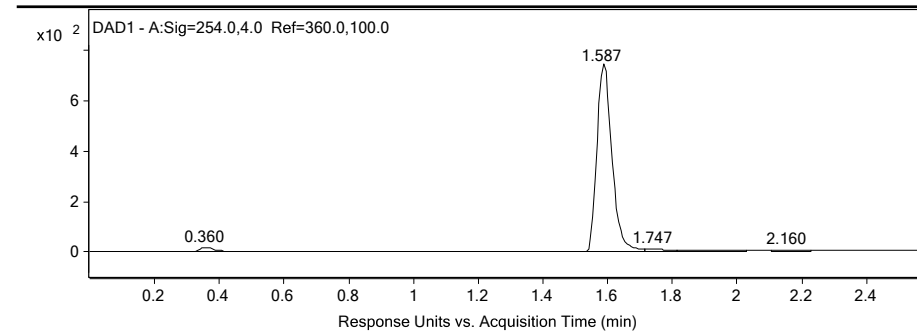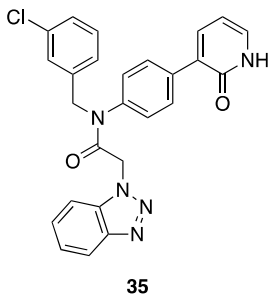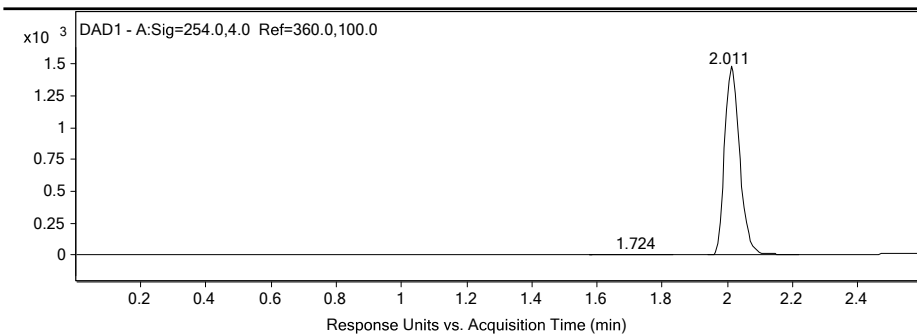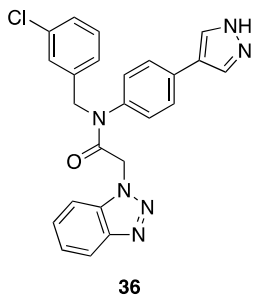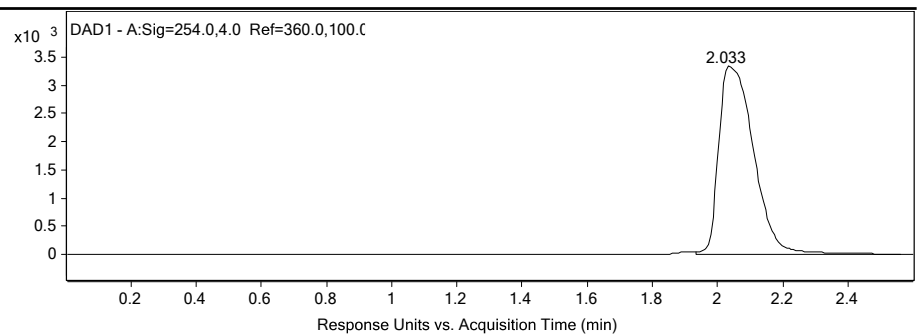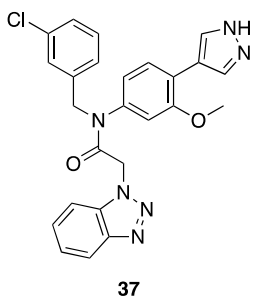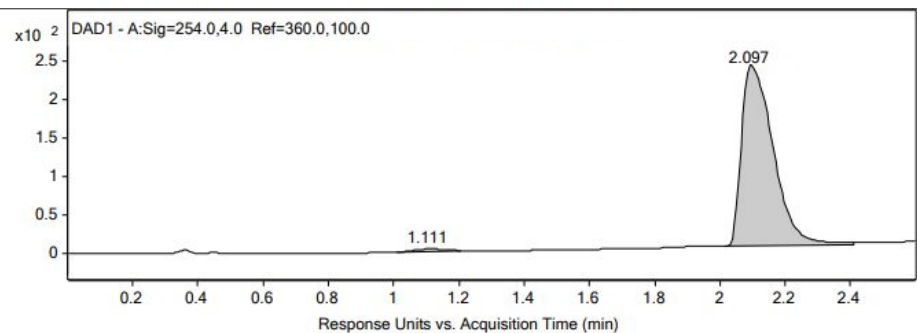



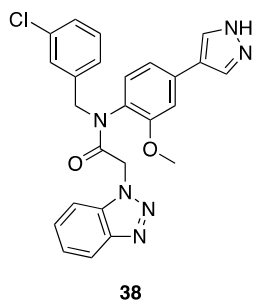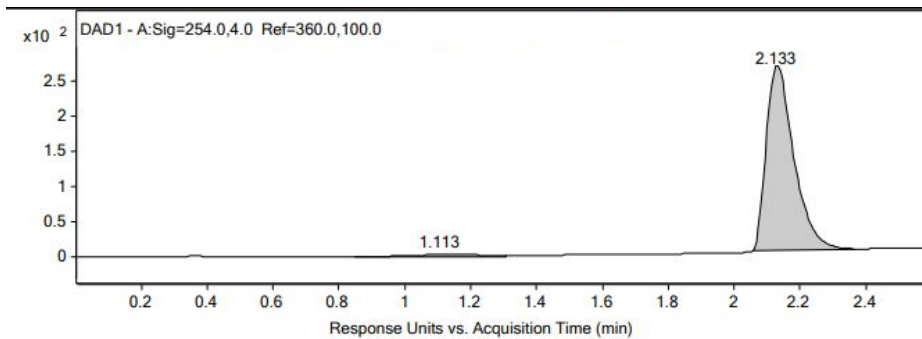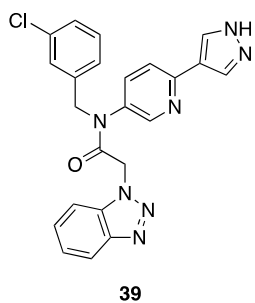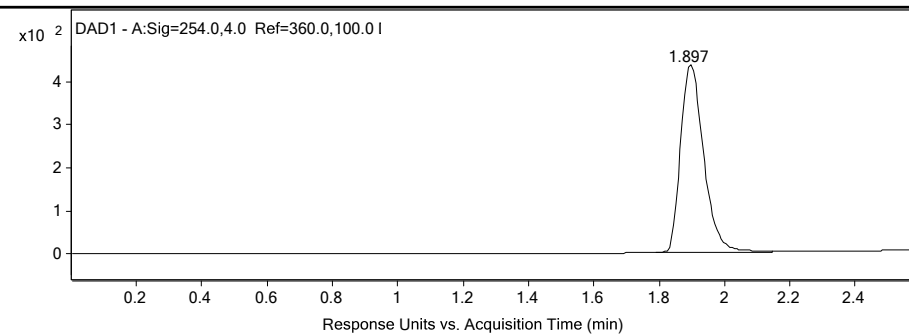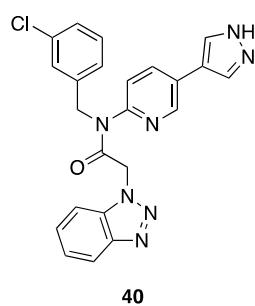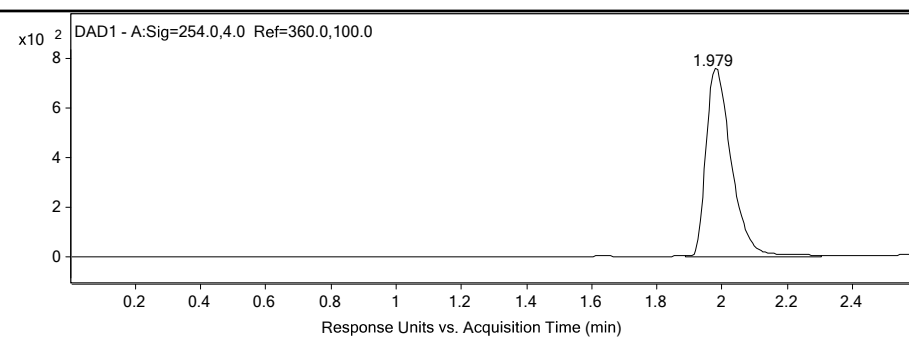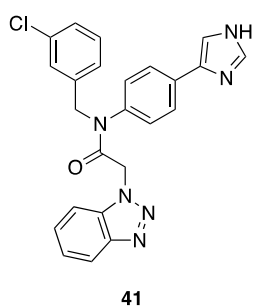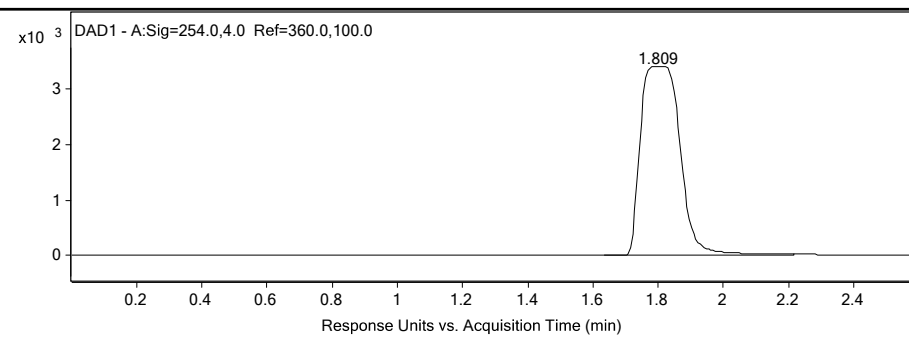

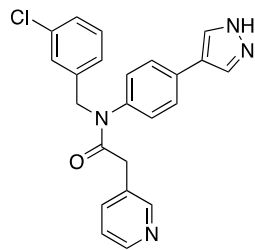

42

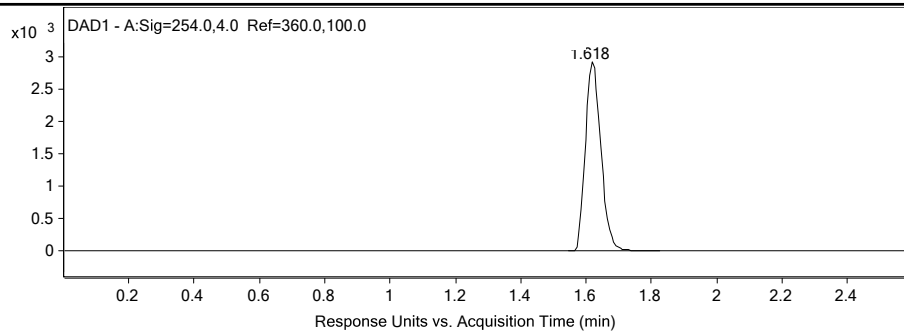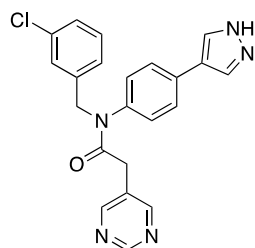

43

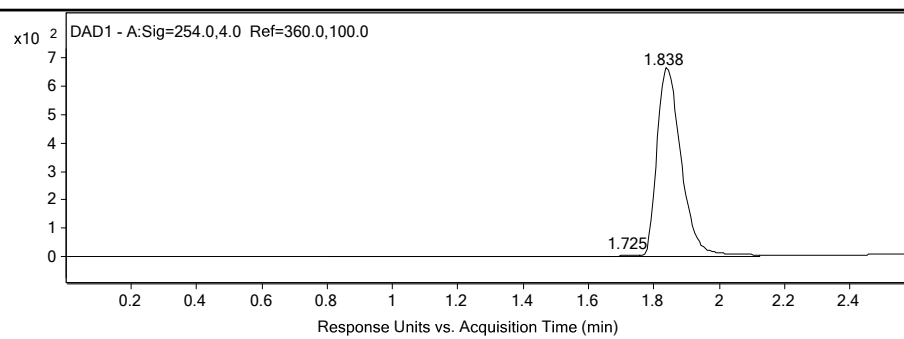

Supplemental Figure S4. SARS-CoV-2 Vero E6 CPE Viability CRC 41

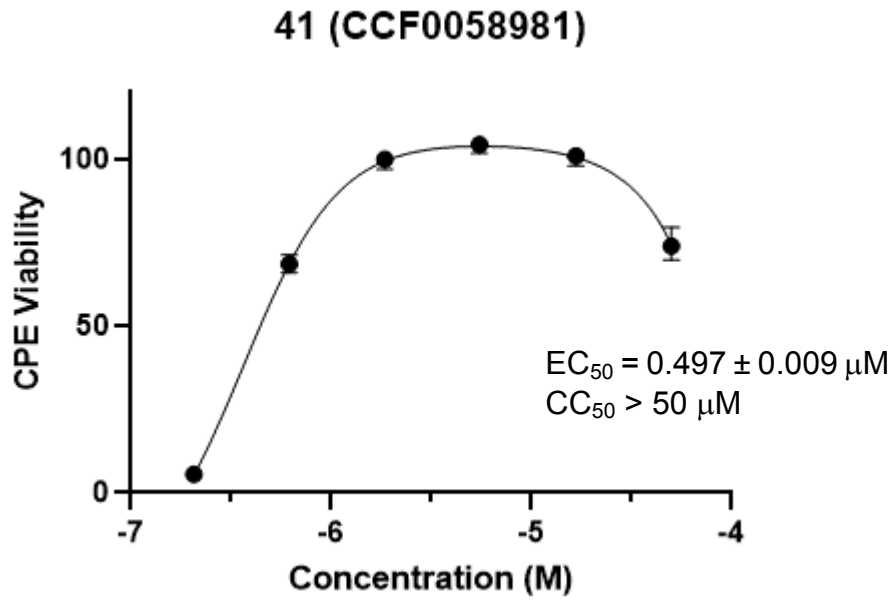

Supplemental Table S5. Viability SARS-CoV-2 mock-infected Vero E6 cells using 41.

| [41]<br>% Viability | 50 μM | 16.6 μM | 5.55 μM | 1.85 μM | 0.617 μM | 0.206 μM |
|---------------------|-------|---------|---------|---------|----------|----------|
|                     | 69.77 | 102.59  | 105.33  | 99.96   | 65.91    | 6.61     |
|                     | 79.50 | 97.90   | 104.39  | 101.21  | 71.29    | 3.49     |
|                     | 73.91 | 100.96  | 101.78  | 96.94   | 68.53    | 5.50     |
